# Supplementary material
Source: Elsevier journal article supplement (https://www.sciencedirect.com/science/article/pii/S1695403321002083)
Supplement: mmc1 [file S1695403321002083:mmc1.doc]

**ANEXO 1. Los nombres del Grupo Español de RCP Pediátrica y Neonatal.**

**Jesús López-Herce.** Servicio de Cuidados Intensivos Pediátricos. Hospital General Universitario Gregorio Marañón de Madrid. Instituto de investigación sanitaria del Hospital Gregorio Marañón. Facultad de Medicina. Universidad Complutense de Madrid. Grupo Español de Reanimación Cardiopulmonar Pediátrica y Neonatal. Red de Salud Maternoinfantil (SAMID II). RETICS financiada por el PN I+D+i 2013-2016, ISCIII- Subdirección General de Evaluación y Fomento de la Investigación y el Fondo Europeo de Desarrollo Regional (FEDER) ref: RD16/0022/0007. Grupo Español de Reanimación Cardiopulmonar Pediátrica y Neonatal

**Ignacio Manrique.** Instituto Valenciano de Pediatría. Grupo Español de Reanimación Cardiopulmonar Pediátrica y Neonatal.

**Custodio Calvo.** Grupo Español de Reanimación Cardiopulmonar Pediátrica y Neonatal

**Antonio Rodríguez.** Área de Pediatría, Servicio de Críticos, Intermedios y Urgencias Pediátricas. Hospital Clínico Universitario de Santiago de Compostela. Grupo de Investigación CLINURSID, Departamento de Enfermería, Universidad de Santiago de Compostela. Instituto de Investigación de Santiago (IDIS). Red de Salud Maternoinfantil (SAMID II). RETICS financiada por el PN I+D+i 2013-2016, ISCIII- Subdirección General de Evaluación y Fomento de la Investigación y el Fondo Europeo de Desarrollo Regional (FEDER) ref: RD16/0022/0007. Grupo Español de Reanimación Cardiopulmonar Pediátrica y Neonatal

**Angel Carrillo.** Grupo Español de Reanimación Cardiopulmonar Pediátrica y Neonatal

**Valero Sebastián.** Centro de Salud Fuente de San Luis. Valencia. Grupo Español de Reanimación Cardiopulmonar Pediátrica y Neonatal

**Jimena del Castillo.** Servicio de Cuidados Intensivos Pediátricos. Hospital General Universitario Gregorio Marañón de Madrid. Instituto de investigación sanitaria del Hospital Gregorio Marañón. Grupo Español de Reanimación Cardiopulmonar Pediátrica y Neonatal. Red de Salud Maternoinfantil (SAMID II). RETICS financiada por el PN I+D+i 2013-2016, ISCIII- Subdirección General de Evaluación y Fomento de la Investigación y el Fondo Europeo de Desarrollo Regional (FEDER) ref: RD16/0022/0007. Grupo Español de Reanimación Cardiopulmonar Pediátrica y Neonatal

**Eva Civantos** Centro de Salud de Barranco Grande. Tenerife. Grupo Español de Reanimación Cardiopulmonar Pediátrica y Neonatal.

**Eva Suárez** Centro de Salud Integrado Burriana II. Castellón. Grupo Español de Reanimación Cardiopulmonar Pediátrica y Neonatal.

**Sara Pons** Servicio de Pediatría Hospital Dr Peset. Valencia. Grupo Español de Reanimación Cardiopulmonar Pediátrica y Neonatal.

**Gonzalo Zeballos.** Servicio de Neonatología. Hospital General Universitario Gregorio Marañón de Madrid. Instituto de investigación sanitaria del Hospital Gregorio Marañón. Grupo Español de Reanimación Cardiopulmonar Pediátrica y Neonatal.

**Maria José** **Aguayo.** Hospital Universitario Virgen del Rocío de Sevilla. Grupo Español de Reanimación Cardiopulmonar Pediátrica y Neonatal.
